# Supplementary material
Source: Springer Nature journal article supplement (https://www.springermedizin.de/resource/supplementary/13601_2013_646_MOESM3_ESM.pdf/9677908)

Normal  
n=127

Intermediate  
n=62

High  
n=37

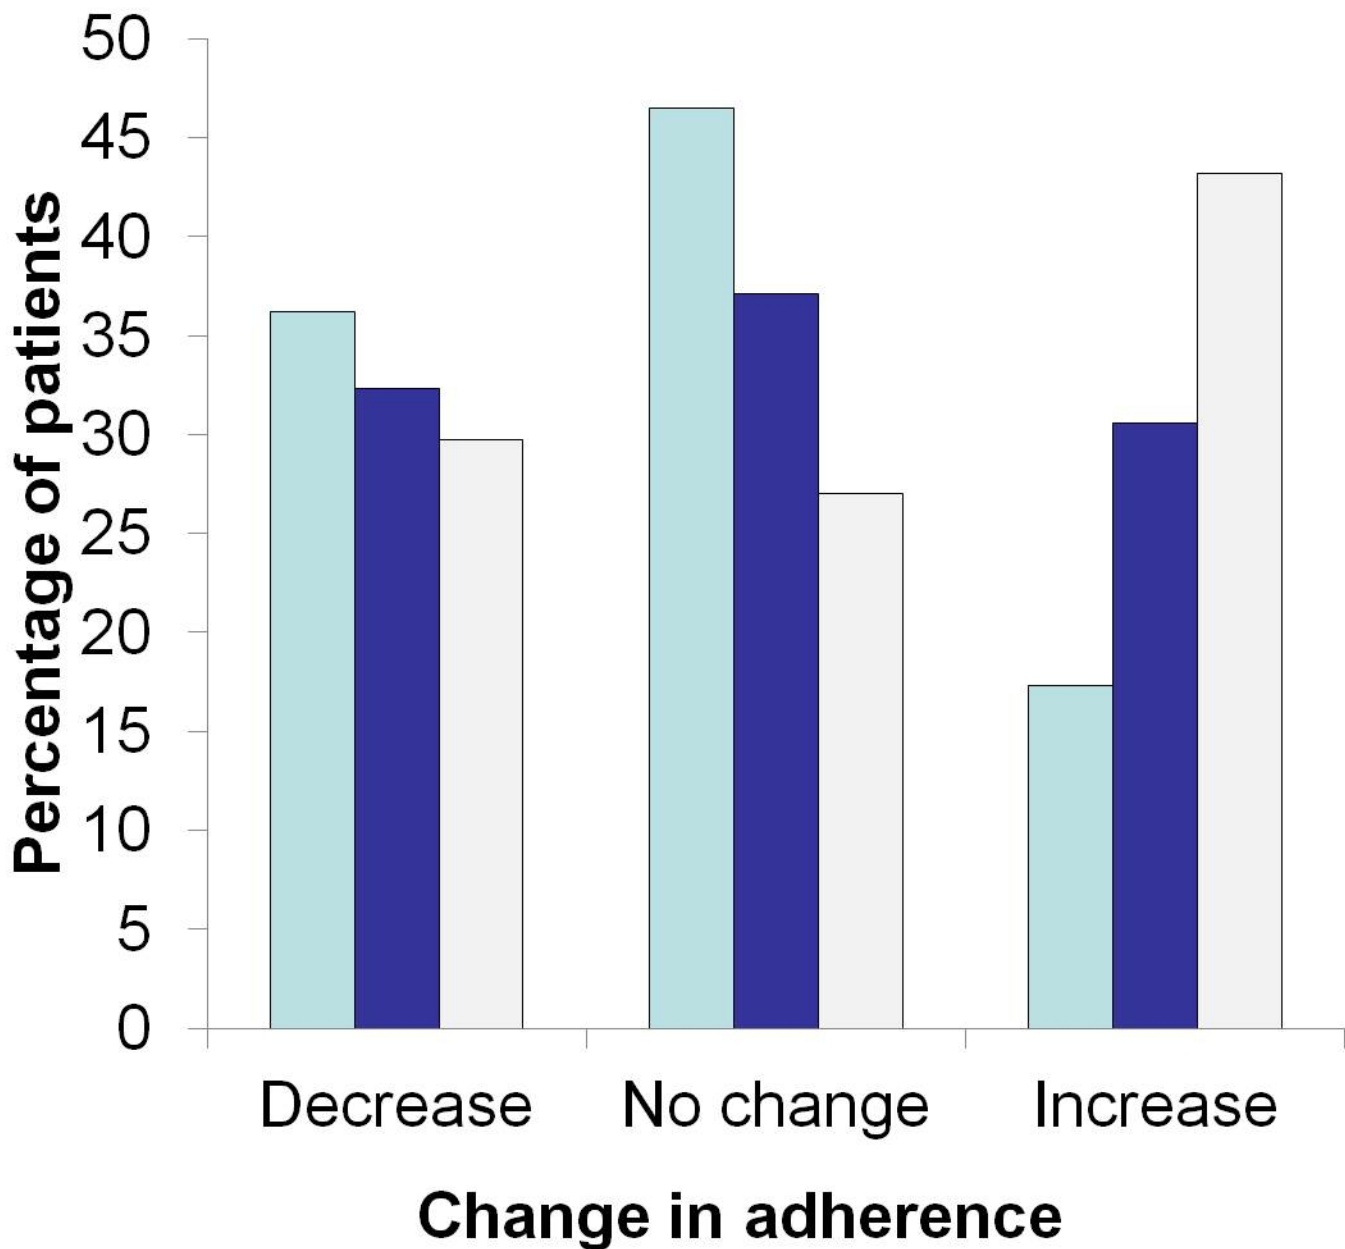

Supplement: MOESM3 [file 9677908]
